# Supplementary material for: Real-World Use of Highly Sensitive Liquid Biopsy Monitoring in Metastatic Breast Cancer Patients Treated with Endocrine Agents after Exposure to Aromatase Inhibitors
Source: MDPI journal article supplement (doi:10.3390/ijms241411419), 2023-07-13

**SUPPLEMENTARY DOCUMENTS**

- Supplementary Figure S1**
- Supplementary Figure S2**
- Supplementary Figure S3**
- Supplementary Figure S4**
- Supplementary Figure S5**

- (Attached separately)**
- Supplementary Table S1. Alterations interrogated by dPCR**
  - Supplementary Table S2. Regions interrogated by the SafeSEQ Breast Cancer Panel**
  - Supplementary Table S3. Description and clinical significance of detected alterations in ctDNA**

**Supplementary Figure S1. A** Higher prevalence of baseline plasma *ESR1* mutations in patients with longer exposure to aromatase inhibitors. **B** Clinical characteristics of patients with baseline *PIK3CA*, *ESR1*, and *TP53* mutations. Statistical significance highlighted in red, non-significant trends highlighted in grey.

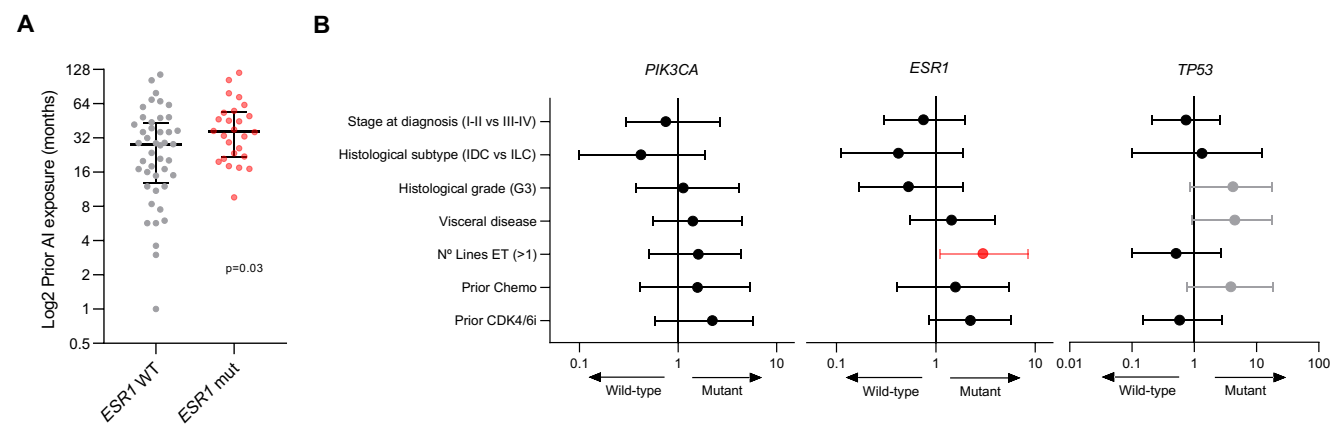

**Supplementary Figure S2. A** Evolution of *PIK3CA* (green) and *ESR1* (red) mutation prevalence across primary, metastasis, and baseline and progression plasma samples. VAF is split by  $\geq 0.1\%$  and  $< 0.1\%$ . **B** Landscape of gene mutations and their VAF in patients with available SafeSEQ data from baseline plasma samples (top panel). Only patients with a pathogenic mutation in baseline plasma are shown. *PIK3CA* and *ESR1* mutations identified by dPCR in tissue samples (bottom panel). VAFs lower than 0.1% are shadowed. **C** Distribution of DNA content according to VAF. **D, E** Venn diagrams illustrating the concordance in *PIK3CA* (up) and *ESR1* (down) mutation detection between tissue and plasma, considering all mutations (left) and those with VAF $\geq 1\%$  (right)

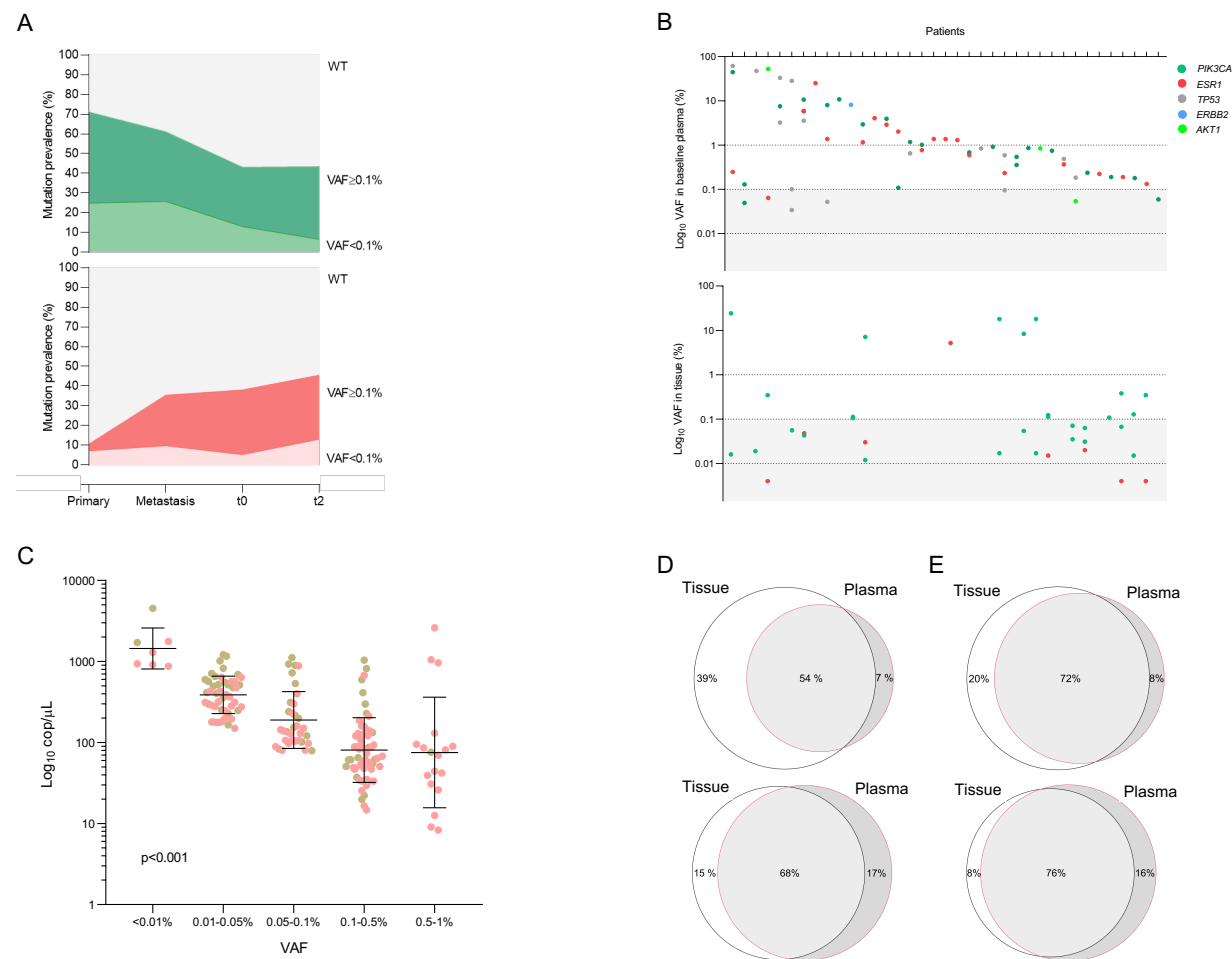

**Supplementary Figure S3. A** Distribution of cfDNA levels early on treatment according to best response by RECIST 1.1. **B** Distribution of cfDNA levels early on treatment according to progression-free survival, stratified by early progressors (<4.5 months) and late progressors (>9 months)

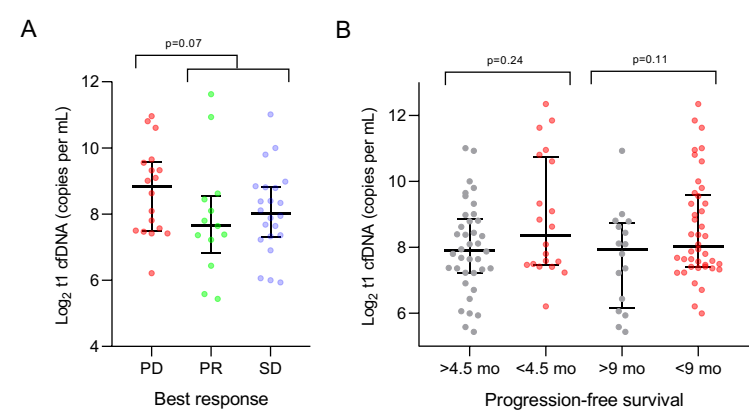

**Supplementary Figure S4. A-D** Impact of baseline plasma *PIK3CA* mutational status in the progression-free survival of patient receiving SERD monotherapy (**A**), aromatase inhibitor monotherapy (**B**), combined endocrine therapy and CDK4/6 inhibitors (**C**), and combined exemestane and everolimus (**D**). **E-H** Impact of baseline plasma *ESR1* mutational status in the above-mentioned subgroups. **I** Influence of the VAF in the prognostic role of *PIK3CA* mutational status. **J, K** Progression-free survival of patients with baseline plasma *PIK3CA* and *ESR1* mutations according to the type of endocrine therapy. **L** Progression-free survival among patients with baseline individual or concurrent mutations, or none.

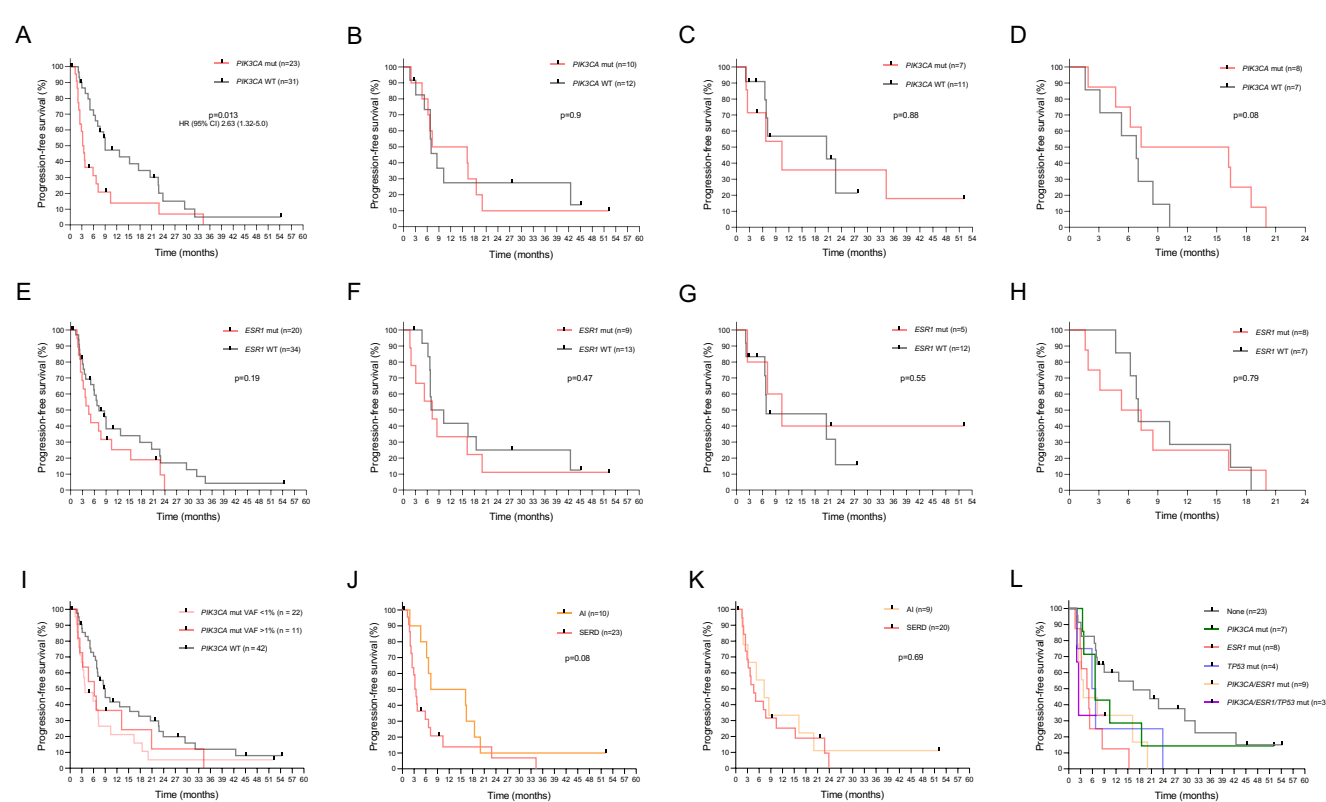

**Supplementary Figure S5. A,B** Impact of early mutant *PIK3CA* dynamics in patients receiving SERD- **(A)** or aromatase inhibitor-containing regimens **(B)**. **C,D** Impact of early mutant *ESR1* dynamics in patients receiving SERD- **(C)** or aromatase inhibitor-containing regimens **(D)**.

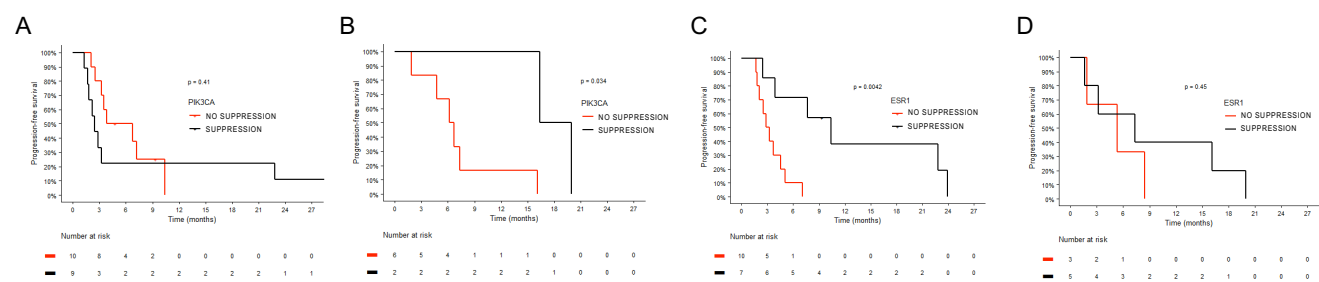

Supplement: s1 [file s1]
