# Supplementary material for: Real-World Use of Highly Sensitive Liquid Biopsy Monitoring in Metastatic Breast Cancer Patients Treated with Endocrine Agents after Exposure to Aromatase Inhibitors
Source: MDPI journal article supplement (doi:10.3390/ijms241411419), 2023-07-13
Supplement: s1 [file s1]

Supplementary Table S1. Interrogated alterations by dPCR

| Gene   | Nucleotide_change | Amino_acid_change | COSMIC_ID    | Assay_ID       | Assay_name | wild type allele (VIC label) | Mutant allele (FAM label) | Foward Primer                 | Reverse Primer            | MGB Probes (wt/mutant)                                  |
|--------|-------------------|-------------------|--------------|----------------|------------|------------------------------|---------------------------|-------------------------------|---------------------------|---------------------------------------------------------|
| PIK3CA | c.1624G>A         | E542K             | COSV55873227 | Hs000000085_rm | PIK3CA_760 | G                            | A                         | NA                            | NA                        | NA                                                      |
| PIK3CA | c.1633G>A         | E545K             | COSV55873239 | Hs000000086_rm | PIK3CA_763 | G                            | A                         | NA                            | NA                        | NA                                                      |
| PIK3CA | c.3140A>G         | H1047R            | COSV55873195 | Hs000000088_rm | PIK3CA_775 | A                            | G                         | NA                            | NA                        | NA                                                      |
| ESR1   | c.1610A>C         | Y537S             | COSV52783938 | AH1SEW5_custom | NA         | A                            | C                         | 5'-CTGTACAGCATGAAGTGAAGAAC-3' | 5'-GGCTAGTGGGCGCATGTAG-3' | 5'-TGCCCCCTCTA TGACCTGC-3' / 5'-TGCCCCCTCTC TGACCTGC-3' |
| ESR1   | c.1613A>G         | D538G             | COSV52781024 | AH519FT_custom | NA         | A                            | G                         | 5'-CTGTACAGCATGAAGTGAAGAAC-3' | 5'-GGCTAGTGGGCGCATGTAG-3' | 5'-CCCTCTATGA CCTGCTGC-3' / 5'-CCCTCTATG CCTGCTGC-3     |
