# Supplementary material for: Real-World Use of Highly Sensitive Liquid Biopsy Monitoring in Metastatic Breast Cancer Patients Treated with Endocrine Agents after Exposure to Aromatase Inhibitors
Source: MDPI journal article supplement (doi:10.3390/ijms241411419), 2023-07-13
Supplement: s1 [file s1]

**Supplementary Table S2. Regions interrogated by the SafeSEQ Breast Cancer Panel.** [GRCh38.p13](#)

| Gene   | Transcript      | Amino Acid Start | Amino Acid End | Primary clinical relevance                                                                                                               |
|--------|-----------------|------------------|----------------|------------------------------------------------------------------------------------------------------------------------------------------|
| ESR1   | ENST00000440973 | 370              | 381            | Acquired after hormone therapy, putative predictive marker for novel ESR1-directed therapies                                             |
|        |                 | 460              | 473            |                                                                                                                                          |
|        |                 | 529              | 538            |                                                                                                                                          |
|        |                 |                  |                |                                                                                                                                          |
| PIK3CA | ENST00000263967 | 86               | 92             | Frequently mutated for ER+/HER2- BC, investigational therapies targeting the PIK/AKT1 pathway                                            |
|        |                 | 111              | 117            |                                                                                                                                          |
|        |                 | 119              | 122            |                                                                                                                                          |
|        |                 | 345              | 352            |                                                                                                                                          |
|        |                 | 363              | 371            |                                                                                                                                          |
|        |                 | 418              | 421            |                                                                                                                                          |
|        |                 | 450              | 462            |                                                                                                                                          |
|        |                 | 538              | 553            |                                                                                                                                          |
|        |                 | 714              | 728            |                                                                                                                                          |
|        |                 | 1040             | 1056           |                                                                                                                                          |
| AKT1   | ENST00000349310 | 17               | 23             | Investigational therapies targeting the PI3K/AKT1 pathway                                                                                |
| ERBB2  | ENST00000269571 | 303              | 315            | Emerging resistance mechanism for ESR1-directed therapies                                                                                |
|        |                 | 754              | 769            |                                                                                                                                          |
|        |                 | 770              | 786            |                                                                                                                                          |
| KRAS   | ENST00000311936 | 4                | 14             | Emerging potential resistance mutation for hormone therapy                                                                               |
| TP53   | ENST00000269305 | 49               | 77             | Frequently mutated for ER+/HER2- BC, "truncal" mutation which can be used to determine presence/absence of detectable ctDNA in the blood |
|        |                 | 99               | 125            |                                                                                                                                          |
|        |                 | 126              | 141            |                                                                                                                                          |
|        |                 | 151              | 179            |                                                                                                                                          |
|        |                 | 192              | 219            |                                                                                                                                          |
|        |                 | 233              | 260            |                                                                                                                                          |
|        |                 | 262              | 285            |                                                                                                                                          |
|        |                 | 297              | 306            |                                                                                                                                          |
|        |                 | 308              | 331            |                                                                                                                                          |
|        |                 | 332              | 360            |                                                                                                                                          |
|        |                 |                  |                |                                                                                                                                          |
